# Supplementary material
Source: PubMed Central journal article supplement (PMC4357941)

Figure S1. Figure showing an evolutionary tree of sulfate reducing delta proteobacteria indicating whether a full genome sequence is available (IMG genome) and whether a homologous complex to Dde\_0681 is present. On the right side of the figure is a representation of operon allowing comparison between species if the complex is present.

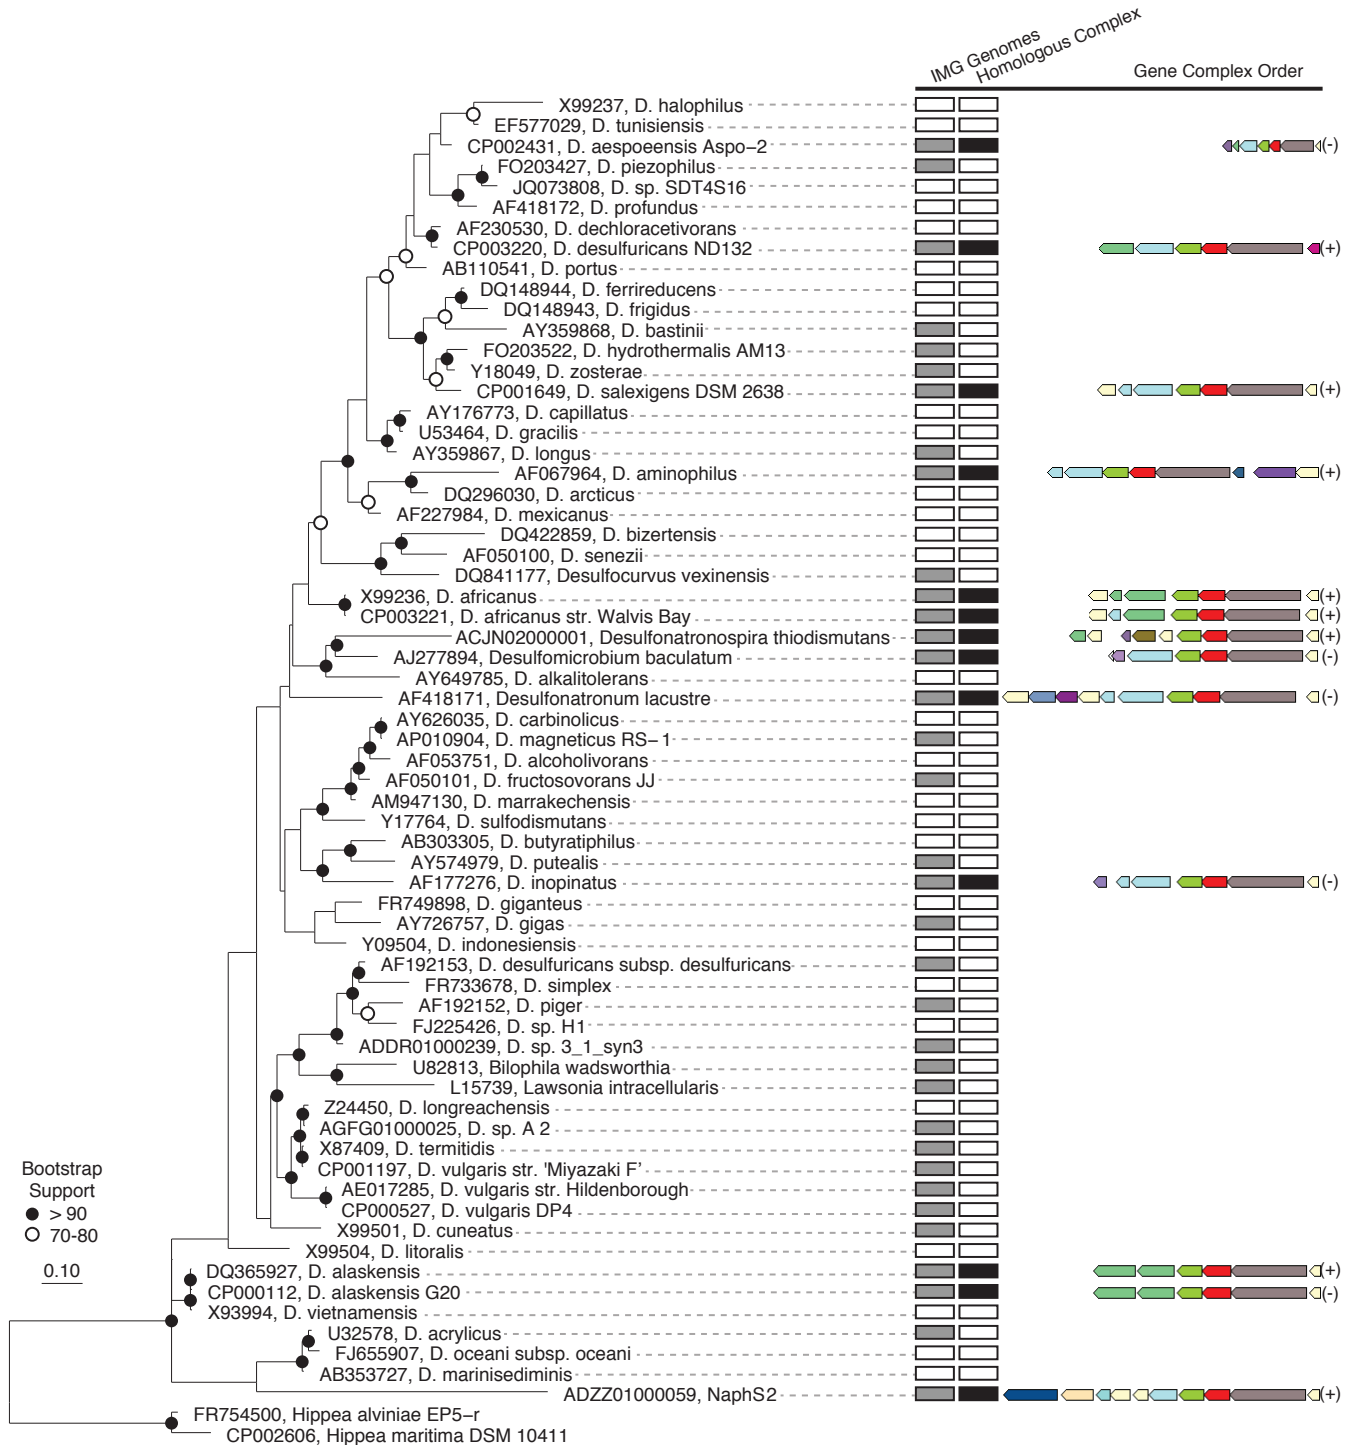

Supplement: AEM.03358-14_zam999116132so1.pdf [file AEM.03358-14_zam999116132so1.pdf]
